# Supplementary material
Source: PubMed Central journal article supplement (PMC3124276)
Supplement: NIHMS297875-supplement-1_si_001.pdf [file NIHMS297875-supplement-1_si_001.pdf]

## Folding of Small Proteins Using Constrained Molecular Dynamics

Gouthaman S. Balaraman,<sup>†</sup> In-Hee Park,<sup>†</sup> Abhinandan Jain,<sup>‡</sup> and Nagarajan Vaidehi<sup>†</sup>

<sup>†</sup> Division of Immunology, Beckman Research Institute of the City of Hope, Duarte, CA 91010, USA.

<sup>‡</sup> Jet Propulsion Laboratory, California Institute of Technology, Pasadena, CA 91109, USA

### Supporting Material

1. We calculated the helicity of the WALP16 peptide using the helical backbone torsions from experiments. These values are  $\phi = -62^\circ$  and  $\psi = -41^\circ$ . The helicity calculated using these angles are shown in red and the helicity calculated using  $\phi = -57^\circ$  and  $\psi = -47^\circ$  is shown in blue. It is seen that the trend in helicity is the same in both the cases.

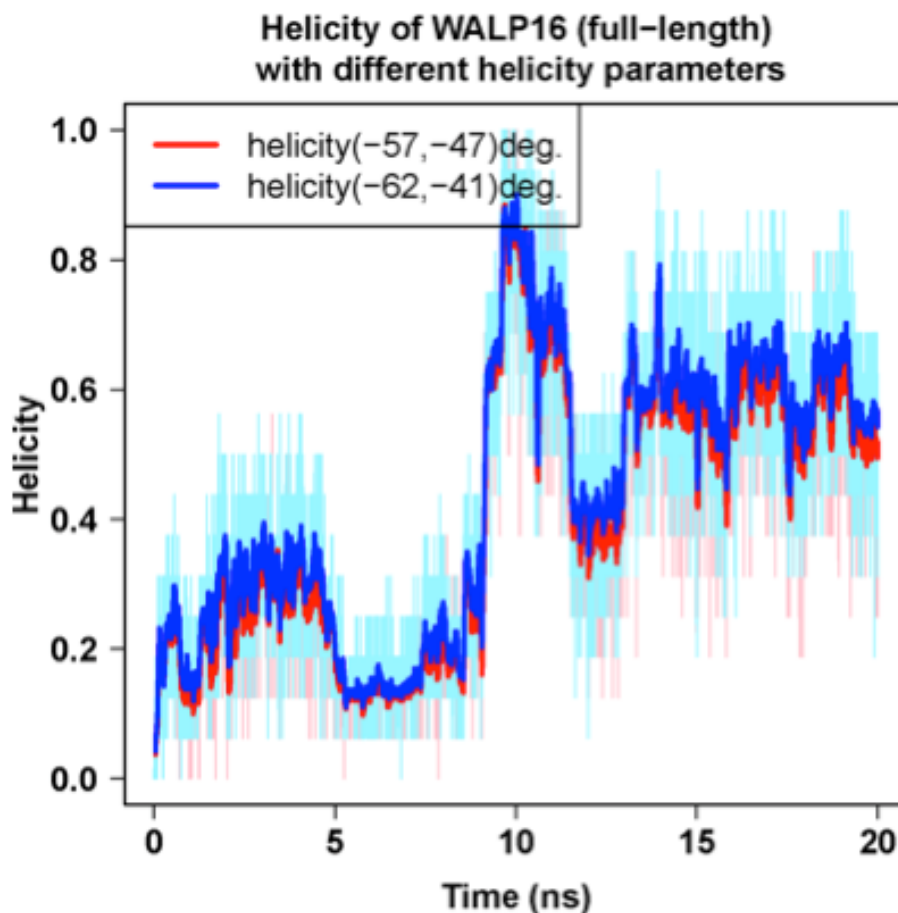

**Figure S1.** Calculated helicity comparison for the full-length WALP16 ( $\Delta$  1-18) using two different helicity parameter set; Red and blue lines are moving averages (50 points average) from the raw helicity data (pink and cyan, respectively).
